# Supplementary material for: Hormone therapy use and breast tissue DNA methylation: analysis of epigenome wide data from the normal breast study
Source: PubMed Central journal article supplement — Epigenetics. 2019 Mar 1;14(2):146–57. doi: 10.1080/15592294.2019.1580111 (PMC6557608; doi:10.1080/15592294.2019.1580111), 2019-03-01
Supplement: kepi-14-02-1580111-s002.pdf [file kepi-14-02-1580111-s002.pdf]

# **Supplemental Material**

## **Hormone therapy use and breast tissue DNA methylation: analysis of epigenome wide data from the normal breast study**

Sophia Harlid, Zongli Xu, Erin Kirk, Lauren E. Wilson, Melissa A. Troester, Jack A. Taylor\*

\*Correspondence to: Jack A. Taylor, MD, PhD, National Institute of Environmental Health Sciences, MD A3-05, 111 T.W. Alexander Drive, PO Box 12233, Research Triangle Park, NC 27709. E-mail: [taylor@niehs.nih.gov](mailto:taylor@niehs.nih.gov). Phone: (919) 541-4631, Fax : (919) 541-2511

| <b><u>Table of Contents:</u></b>                                              | <b><u>Page</u></b> |
|-------------------------------------------------------------------------------|--------------------|
| Figure S1 (pyrosequencing correlation)                                        | 2                  |
| Figure S2 ( <i>ARHGEF4</i> expression and BrCa characteristics)               | 3                  |
| Figure S3 (sample selection)                                                  | 4                  |
| Table S1. HT characteristics                                                  | 5                  |
| Table S2. CpGs significant in at least one test (available in separate sheet) | 5                  |
| Table S3 Mean methylation values from pyrosequencing                          | 6                  |
| Table S4. Mean beta-values for the twelve CpGs                                | 6                  |
| Table S5. Pyrosequencing primers                                              | 7                  |

**Fig. S1**

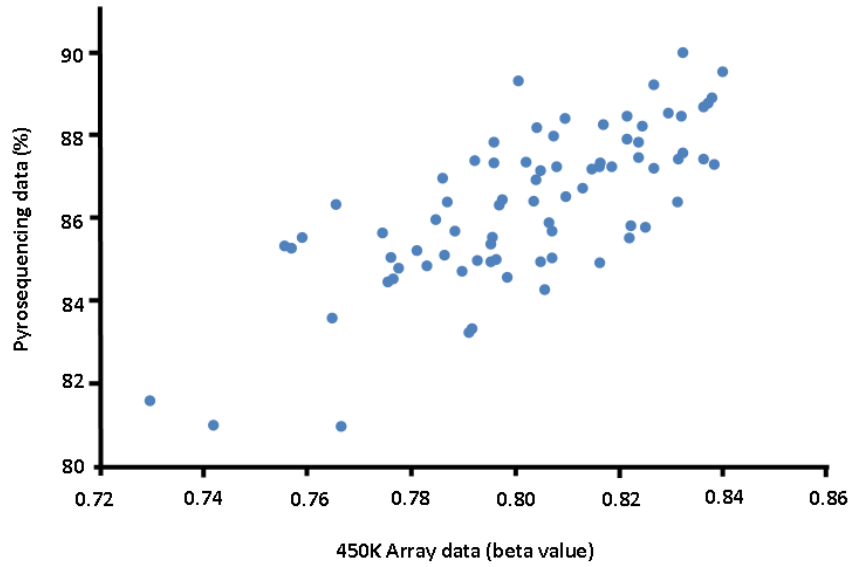

**Fig. S1** Correlation between raw 450K beta values and % methylation derived using pyrosequencing. Pearson's correlation = 0.73

**Fig. S2**

**a**

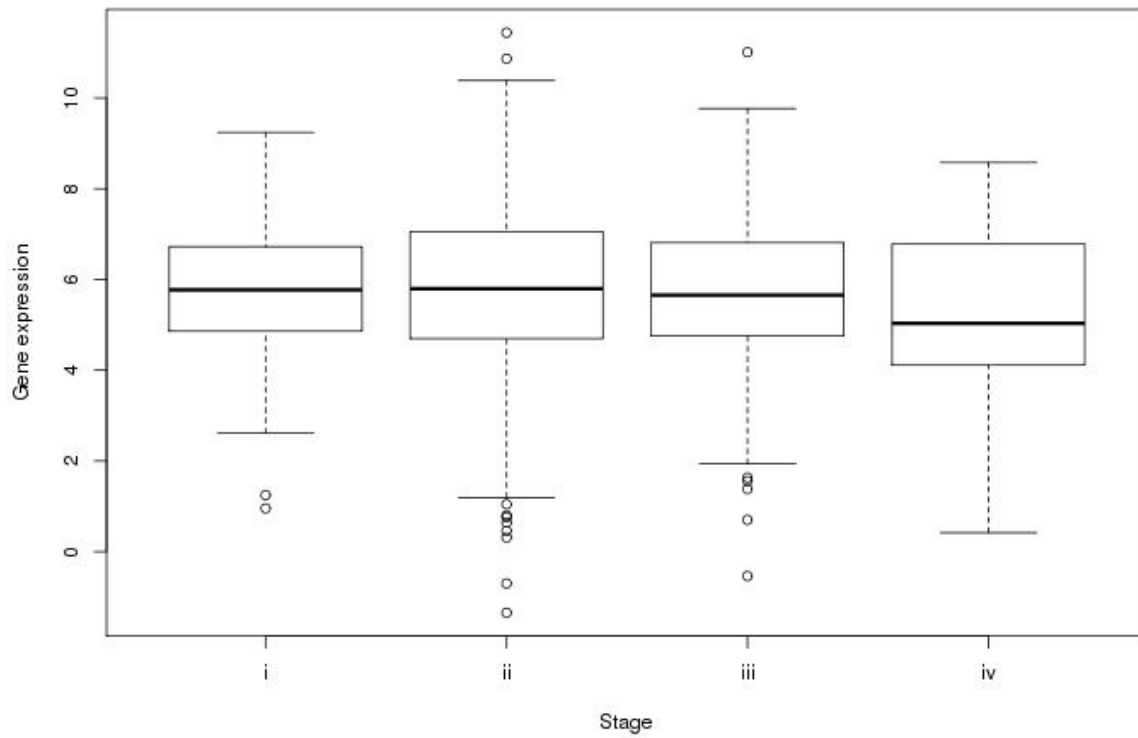

**b**

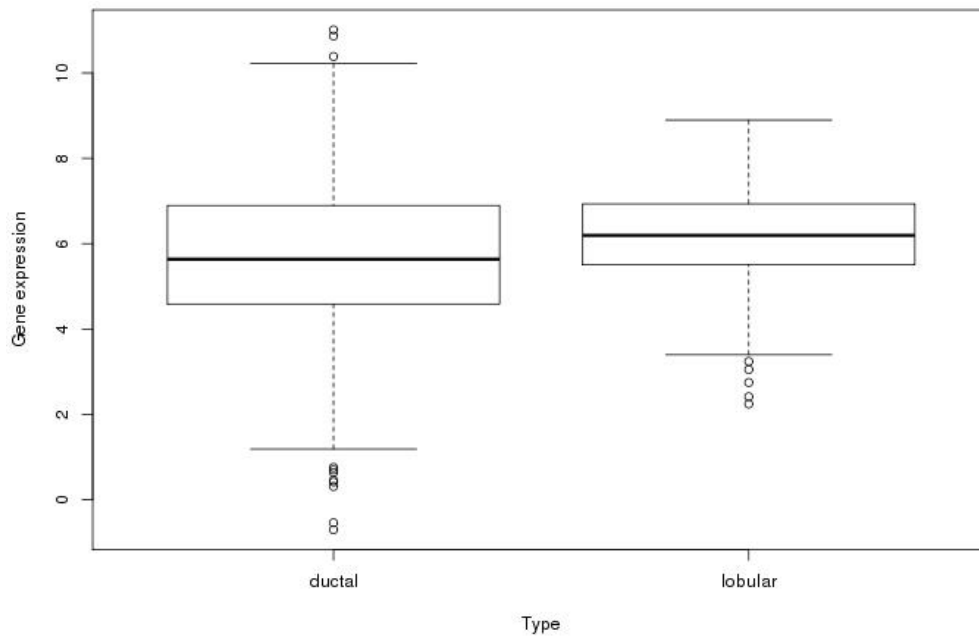

**Fig. S2** *ARHGEF4* gene expression related to breast cancer stage and subtype (data from TCGA). a) Expression of *ARHGEF4* in tumor samples from different stages of breast cancer (I-IV), b) Expression of *ARHGEF4* in tumor samples from ductal and lobular breast cancer.

**Fig. S3**

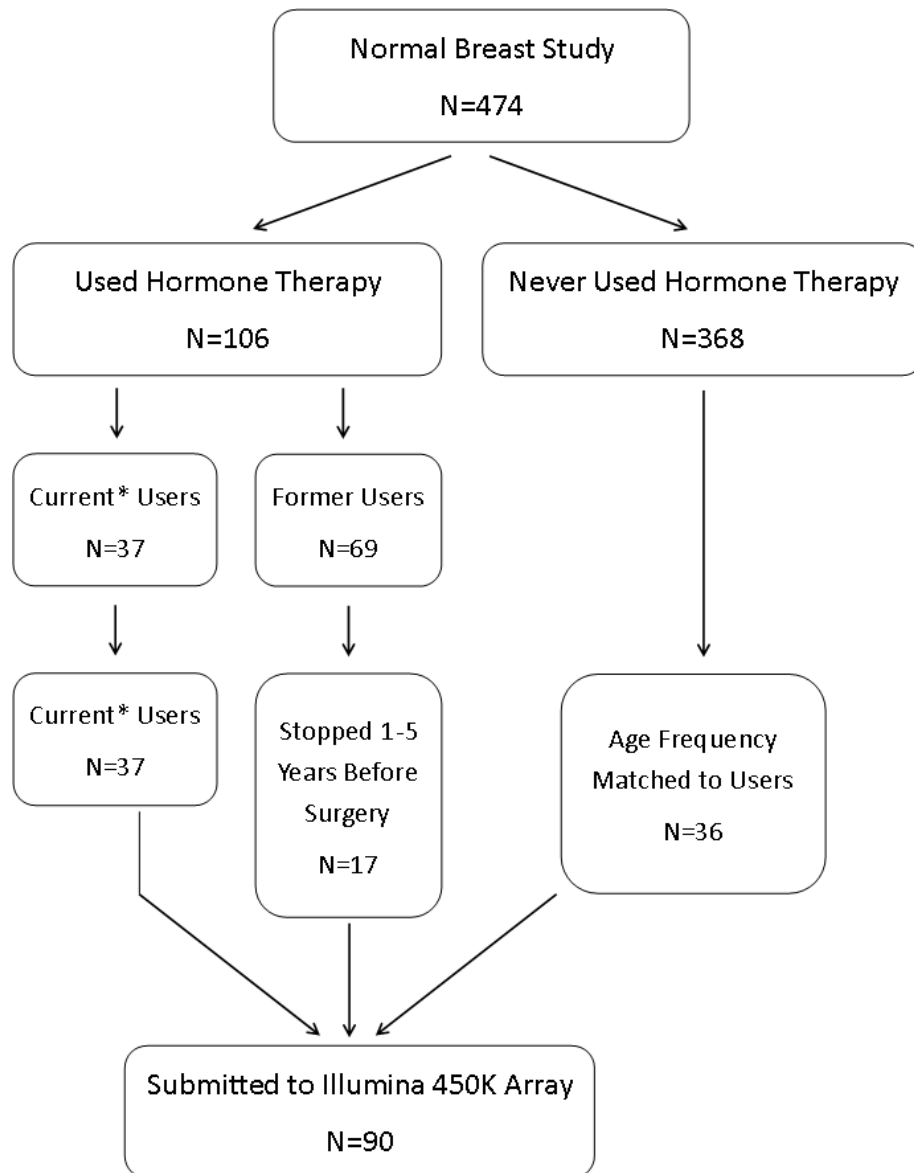

**Fig. S3** Flowchart describing the selection of samples for DNA methylation analysis.

---

**Table S1.** Participant characteristics (HT-users only)

| Characteristic                | HT users<br>N (%) |
|-------------------------------|-------------------|
| <b>Time since quitting HT</b> |                   |
| 0 years*                      | 4 (7)             |
| <1 year                       | 33 (61)           |
| 1-5 years                     | 17 (32)           |
| <b>Type of HT</b>             |                   |
| Combined                      | 26 (48)           |
| Estrogen only                 | 12 (22)           |
| Progesterone only             | 2 (4)             |
| Missing                       | 14 (26)           |
| <b>Duration of HT use</b>     |                   |
| <1 year                       | 1                 |
| 1-5 years                     | 18                |
| 6-10 years                    | 9                 |
| >10 years                     | 26                |

---

**Table S2.** CpGs significant in at least one test

*Available as excel sheet*

**Table S3.** Mean methylation values (%) from pyrosequencing and Illumina450K bead array of cg26334888 (FAM3D)

| Probe      | CHR | Gene  | Method              | EVER/NEVER |       | Duration of use |            |           | Recency of use |        |       |
|------------|-----|-------|---------------------|------------|-------|-----------------|------------|-----------|----------------|--------|-------|
|            |     |       |                     | Ever       | Never | 1-5 years       | 6-10 years | >10 years | Current        | Former | Never |
| cg26334888 | 3   | FAM3D | <b>Pyroseq. (%)</b> | 86.6       | 86.0  | 86.9            | 86.4       | 86.5      | 86.8           | 86.1   | 86.0  |
| cg26334888 | 3   | FAM3D | <b>Array (%)</b>    | 81.0       | 79.0  | 81.2            | 80.8       | 80.9      | 81.4           | 80.0   | 79.0  |

**Table S4.** Mean beta-values for the twelve CpGs that were significant in all three analyses

| Probe      | CHR | Gene / Location | Ever / Never |       | Duration of use |            |           | Recency of use |        |       |
|------------|-----|-----------------|--------------|-------|-----------------|------------|-----------|----------------|--------|-------|
|            |     |                 | Ever         | Never | 1-5 years       | 6-10 years | >10 years | Current        | Former | Never |
| cg01382688 | 2   | ARHGEF4         | 0.930        | 0.914 | 0.928           | 0.932      | 0.932     | 0.930          | 0.930  | 0.914 |
| cg01571735 | 2   | SP5             | 0.037        | 0.032 | 0.037           | 0.037      | 0.038     | 0.037          | 0.037  | 0.032 |
| cg02245004 | 15  | 15q24           | 0.076        | 0.102 | 0.076           | 0.082      | 0.073     | 0.076          | 0.075  | 0.102 |
| cg08460153 | 7   | TNRC18          | 0.014        | 0.011 | 0.014           | 0.012      | 0.014     | 0.013          | 0.014  | 0.011 |
| cg08975834 | 10  | TCERG1L         | 0.886        | 0.863 | 0.879           | 0.881      | 0.892     | 0.887          | 0.885  | 0.863 |
| cg09742643 | 7   | PTPRN2          | 0.910        | 0.867 | 0.908           | 0.917      | 0.909     | 0.913          | 0.906  | 0.867 |
| cg11034191 | 4   | INPP4B          | 0.021        | 0.017 | 0.019           | 0.023      | 0.022     | 0.020          | 0.022  | 0.017 |
| cg15028339 | 5   | RAI14           | 0.915        | 0.891 | 0.914           | 0.915      | 0.916     | 0.918          | 0.912  | 0.891 |
| cg16416165 | 4   | RGS12           | 0.962        | 0.950 | 0.963           | 0.963      | 0.961     | 0.962          | 0.961  | 0.950 |
| cg26098117 | 6   | 6q22            | 0.879        | 0.846 | 0.876           | 0.876      | 0.882     | 0.885          | 0.872  | 0.846 |
| cg26185079 | 18  | SLMO1           | 0.856        | 0.839 | 0.852           | 0.864      | 0.856     | 0.866          | 0.843  | 0.839 |
| cg26705583 | 5   | SGTB            | 0.027        | 0.022 | 0.028           | 0.025      | 0.027     | 0.028          | 0.025  | 0.022 |

---

**Table S5.** Pyrosequencing primers.

| <b>Primers for FAM3D, cg26334888</b> | <b>Sequence</b>                        |
|--------------------------------------|----------------------------------------|
| Forward Primer                       | 5'- TGGGGTATATTGAATTAGAGGTTAAAGG-3'    |
| Reverse Primer                       | 5'-Biotin- CCACTAAACAACCCTTCTTTTCTT-3' |
| Sequencing Primer                    | 5'- GTGTGGAGAAAGGGA-3'                 |
